# Supplementary material for: Severe Acute Respiratory Syndrome Coronavirus 2 Receptor (Human Angiotensin-Converting Enzyme 2) Binding Inhibition Assay: A Rapid, High-Throughput Assay Useful for Vaccine Immunogenicity Evaluation
Source: MDPI journal article supplement (doi:10.3390/microorganisms11020368), 2023-02-01
Supplement: s1 [file s1]

**Supplement to “Severe Acute Respiratory Syndrome Coronavirus 2 Receptor (Human Angiotensin-Converting Enzyme 2) Binding Inhibition Assay: A Rapid, High-Throughput Assay Useful for Vaccine Immunogenicity Evaluation”**

**Table S1.** Assay robustness - lower incubation time limit results

| Sample # | Sample ID | Reference Condition<br>Titer | Lower Incubation<br>Time Limit |       | % Recovery | % Difference |
|----------|-----------|------------------------------|--------------------------------|-------|------------|--------------|
|          |           |                              | Titer <sup>a</sup>             | GMT   |            |              |
| 1        | HQC       | 158.5                        | 148<br>135.4                   | 141.6 | 89.3       | -10.7        |
| 2        | MQC       | 66.6                         | 61.4<br>60.5                   | 60.9  | 60.9       | 91.5         |
| 3        | LQC       | 37.6                         | 35.8<br>35.4                   | 35.6  | 35.6       | 94.7         |
| 4        | NC        | 5                            | 5<br>5                         | 5     | 5          | 100          |
| 5        | Serum #12 | 11                           | 8.7<br>8.4                     | 8.5   | 8.5        | 77.7         |
| 6        | Serum #13 | 115.5                        | 101.5<br>103.9                 | 102.7 | 102.7      | 88.9         |
| 7        | Serum #14 | 22.3                         | 19.5<br>18.6                   | 19    | 19         | 85.4         |
| 8        | Serum #15 | 170.3                        | 149.3<br>166.2                 | 157.5 | 157.5      | 92.5         |
| 9        | Serum #16 | 54.7                         | 48.6<br>46.2                   | 47.4  | 47.4       | 86.6         |
| 10       | Serum #17 | 93.7                         | 76                             | 76.7  | 76.7       | 81.9         |

|    |           |      |      |      |      |       |
|----|-----------|------|------|------|------|-------|
|    |           |      | 77.4 |      |      |       |
| 11 | Serum #18 | 22.4 | 21.8 | 21   | 21   | 93.9  |
|    |           |      | 20.3 |      |      |       |
| 12 | Serum #19 | 61.6 | 50.3 | 51.3 | 51.3 | 83.3  |
|    |           |      | 52.4 |      |      |       |
| 13 | Serum #20 | 18   | 19.1 | 17.7 | 17.7 | 98.3  |
|    |           |      | 16.4 |      |      |       |
| 14 | Serum #21 | 26.9 | 26.2 | 26.3 | 26.3 | 98    |
|    |           |      | 26.5 |      |      |       |
| 15 | Serum #22 | 27.9 | 26.1 | 26.3 | 26.3 | 94.4  |
|    |           |      | 26.6 |      |      |       |
| 16 | Serum #23 | 62.3 | 52.3 | 55.1 | 55.1 | 88.4  |
|    |           |      | 58   |      |      |       |
| 17 | Serum #24 | 13.6 | 14.9 | 14   | 14   | 103.1 |
|    |           |      | 13.2 |      |      |       |
| 18 | Serum #1  | 91.4 | 91.5 | 88.4 | 88.4 | 96.8  |
|    |           |      | 85.5 |      |      |       |
| 19 | Serum #2  | 62.4 | 54.9 | 58.5 | 58.5 | 93.7  |
|    |           |      | 62.3 |      |      |       |
| 20 | Serum #3  | 81.1 | 88.3 | 90.2 | 90.2 | 111.3 |
|    |           |      | 92.2 |      |      |       |

\*Samples were tested in duplicate in each assay, so 2 titer values are shown for each sample.

Numbers in italics indicate values outside of acceptable range.

GMT—geometric mean titer; HQC—high quality control; ID—identification; LQC—low quality control; MQC—mid quality control; NC—negative control.

**Table S2.** Assay robustness - upper incubation time limit results

| Sample # | Sample ID | Reference Condition<br>Titer | Upper Incubation<br>Time Limit |       | % Recovery | % Difference |
|----------|-----------|------------------------------|--------------------------------|-------|------------|--------------|
|          |           |                              | Titer <sup>a</sup>             | GMT   |            |              |
| 1        | HQC       | 158.5                        | 149.4<br>158.7                 | 154   | 97.1       | -2.9         |
| 2        | MQC       | 66.6                         | 64.4<br>61.5                   | 62.9  | 94.5       | -5.5         |
| 3        | LQC       | 37.6                         | 39<br>39.6                     | 39.3  | 104.5      | 4.5          |
| 4        | NC        | 5                            | 5<br>5                         | 5     | 100        | 0            |
| 5        | Serum #12 | 11                           | 10.3<br>11.4                   | 10.8  | 98.5       | -1.5         |
| 6        | Serum #13 | 115.5                        | 114.4<br>112.6                 | 113.5 | 98.3       | -1.7         |
| 7        | Serum #14 | 22.3                         | 23.8<br>25.1                   | 24.4  | 109.6      | 9.6          |
| 8        | Serum #15 | 170.3                        | 161.7<br>190.8                 | 175.6 | 103.1      | 3.1          |
| 9        | Serum #16 | 54.7                         | 59<br>61.5                     | 60.2  | 110.1      | 10.1         |
| 10       | Serum #17 | 93.7                         | 95.5<br>93.7                   | 94.6  | 101        | 1            |
| 11       | Serum #18 | 22.4                         | 27<br>27.9                     | 27.4  | 122.5      | 22.5         |

|    |           |      |       |       |       |      |
|----|-----------|------|-------|-------|-------|------|
| 12 | Serum #19 | 61.6 | 63.6  | 74    | 120.2 | 20.2 |
|    |           |      | 86.2  |       |       |      |
| 13 | Serum #20 | 18   | 19.1  | 20.1  | 111.8 | 11.8 |
|    |           |      | 21.2  |       |       |      |
| 14 | Serum #21 | 26.9 | 28.7  | 30.1  | 111.8 | 11.8 |
|    |           |      | 31.5  |       |       |      |
| 15 | Serum #22 | 27.9 | 31    | 30.5  | 109.3 | 9.3  |
|    |           |      | 30    |       |       |      |
| 16 | Serum #23 | 62.3 | 61    | 65.5  | 105.2 | 5.2  |
|    |           |      | 70.4  |       |       |      |
| 17 | Serum #24 | 13.6 | 16.3  | 16.1  | 118.4 | 18.4 |
|    |           |      | 15.9  |       |       |      |
| 18 | Serum #1  | 91.4 | 97.6  | 93.6  | 102.4 | 2.4  |
|    |           |      | 89.7  |       |       |      |
| 19 | Serum #2  | 62.4 | 61    | 61.2  | 98.2  | -1.8 |
|    |           |      | 61.5  |       |       |      |
| 20 | Serum #3  | 81.1 | 117.9 | 133.8 | 165   | 65   |
|    |           |      | 151.8 |       |       |      |

<sup>a</sup>Samples were tested in duplicate in each assay, so 2 titer values are shown for each sample.

Numbers in italics indicate values outside of acceptable range.

GMT—geometric mean titer; HQC—high quality control; ID—identification; LQC—low quality control; MQC—mid quality control; NC—negative control.

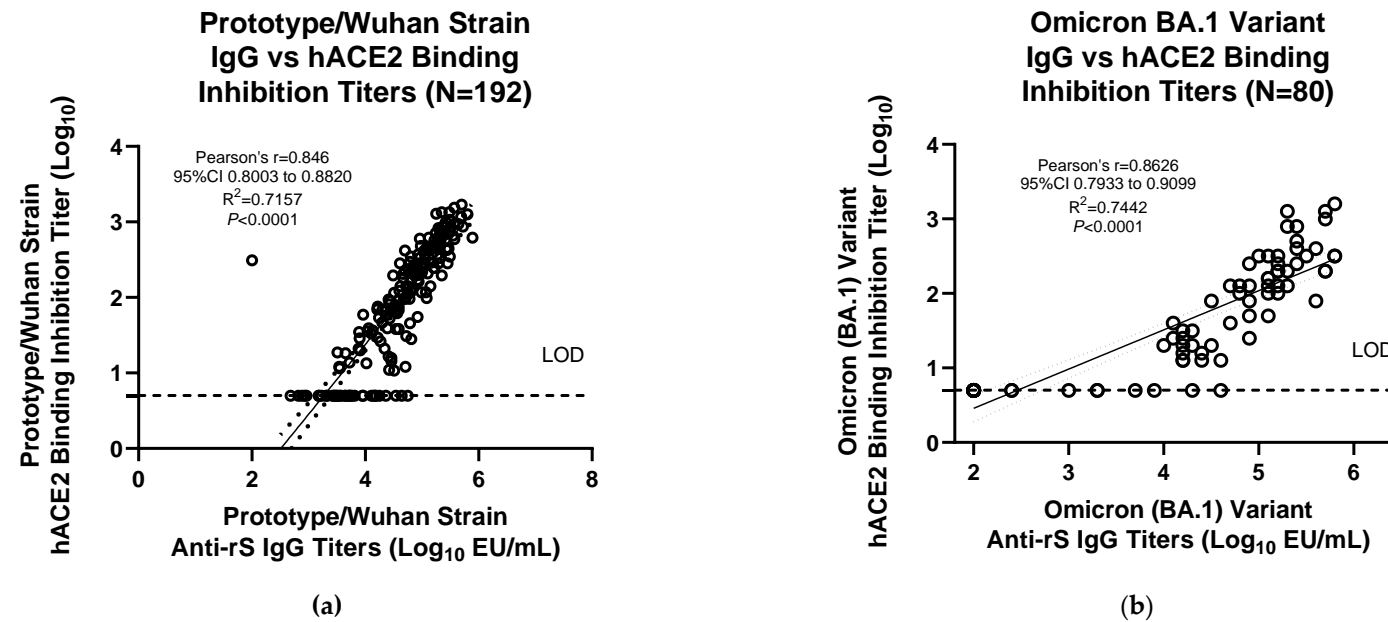

**Figure S1.** Correlation of prototype/Wuhan strain and Omicron variant (BA.1) hACE2 binding inhibition with anti-rS IgG. **(a-b)** Detection of anti-rS IgG antibodies was performed as previously described in Formica et al. 2021 [18]. Linear regression analysis was performed with all the hACE2 binding inhibition results, including values at LOD, to compare results from the IgG assay and the hACE2 binding inhibition assay for **(a)** prototype/Wuhan strain or **(b)** Omicron BA.1 variant. hACE2—human angiotensin-converting enzyme 2; IgG—immunoglobulin G; LOD— limit of detection;  $\text{Log}_{10}$ —logarithm with base 10; rS—recombinant spike.
